# Supplementary material
Source: MDPI journal article supplement (https://www.mdpi.com/2073-4395/14/5/1075)

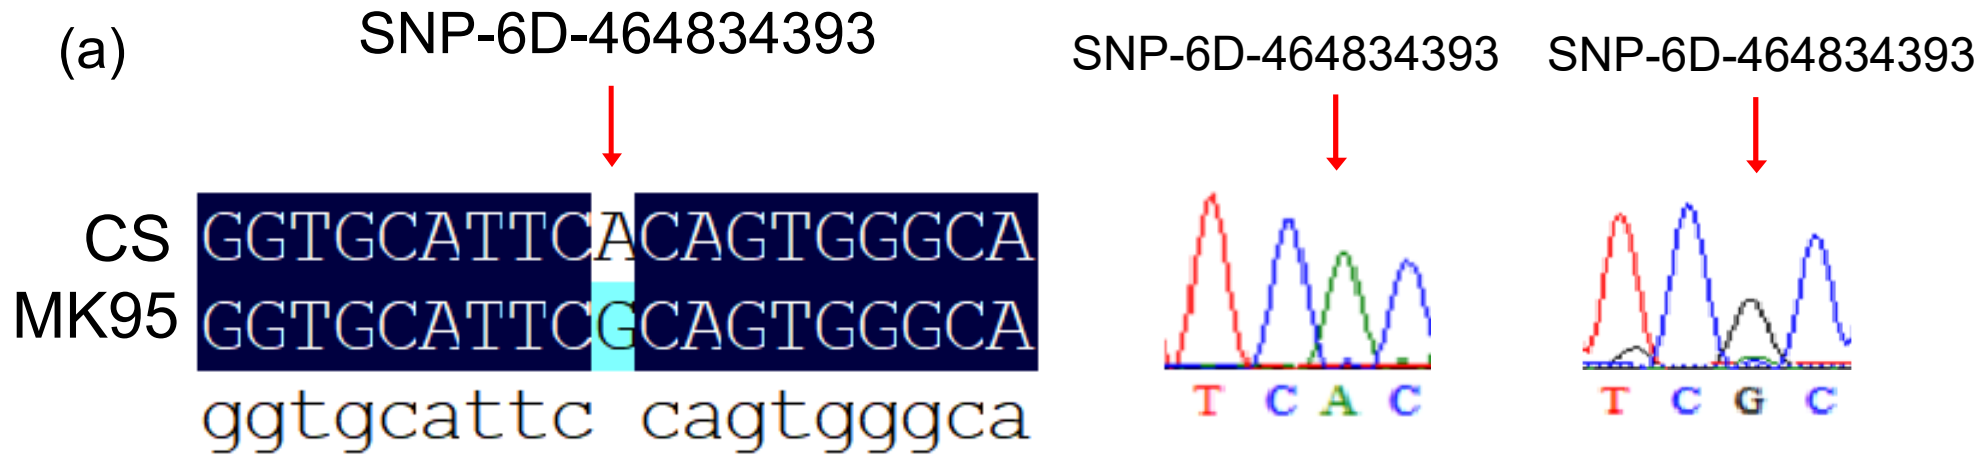

| (b) | Prime ID           | Primer Sequence (5'-3') |
|-----|--------------------|-------------------------|
|     | SNP-6D-464834393-F | AAAGGTGGTGGAGGGATA      |
|     | SNP-6D-464834393-R | ACCGAGGAGAACTGGCAAG     |

Supplement: s1 [file s1]

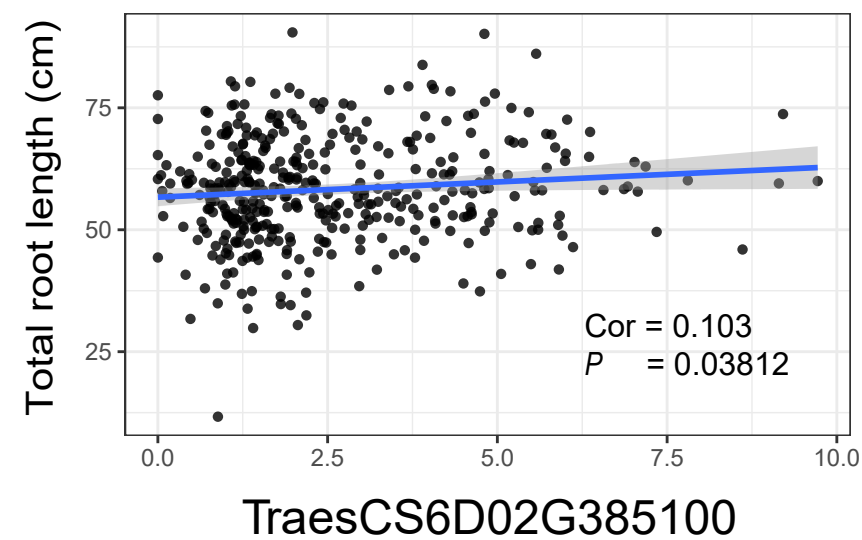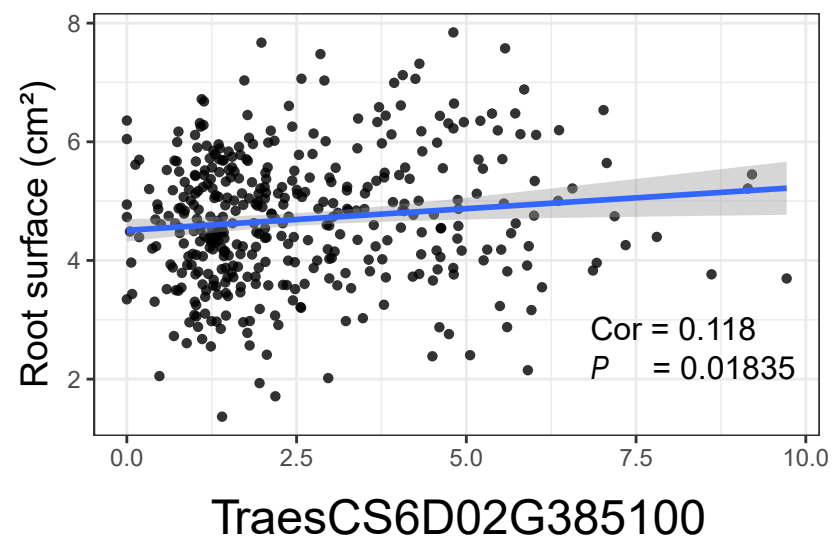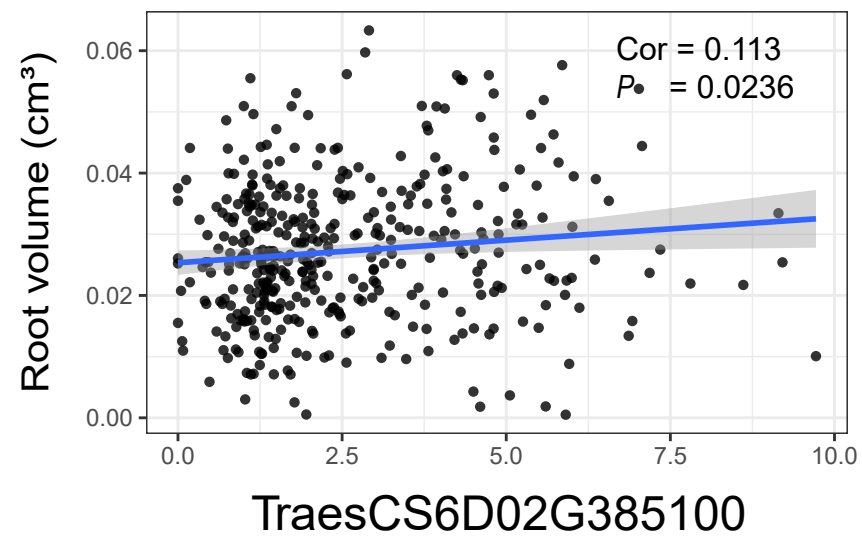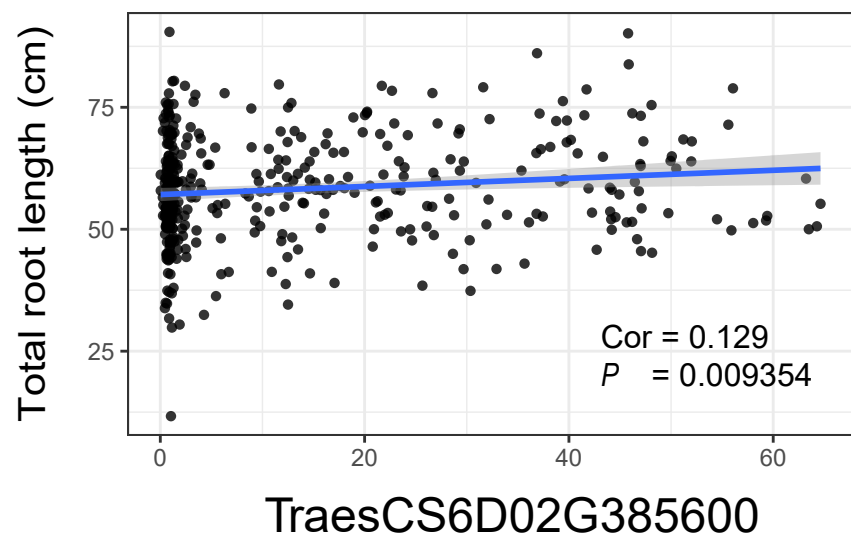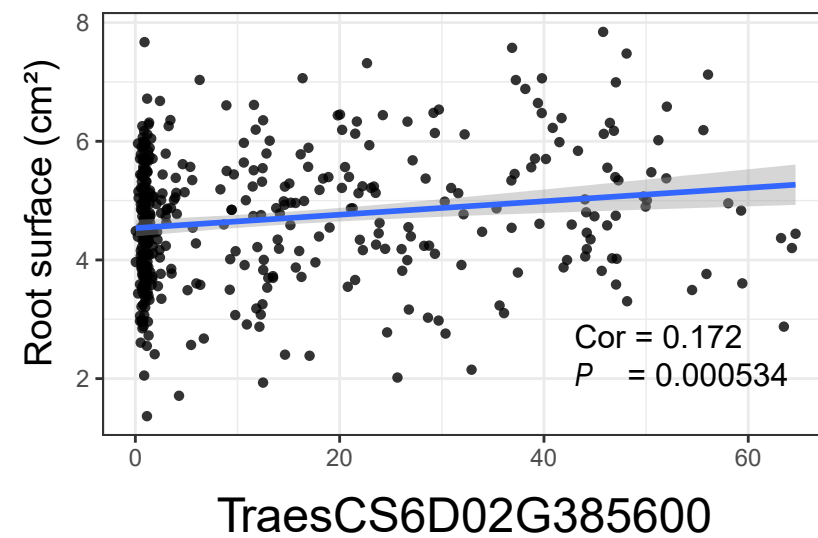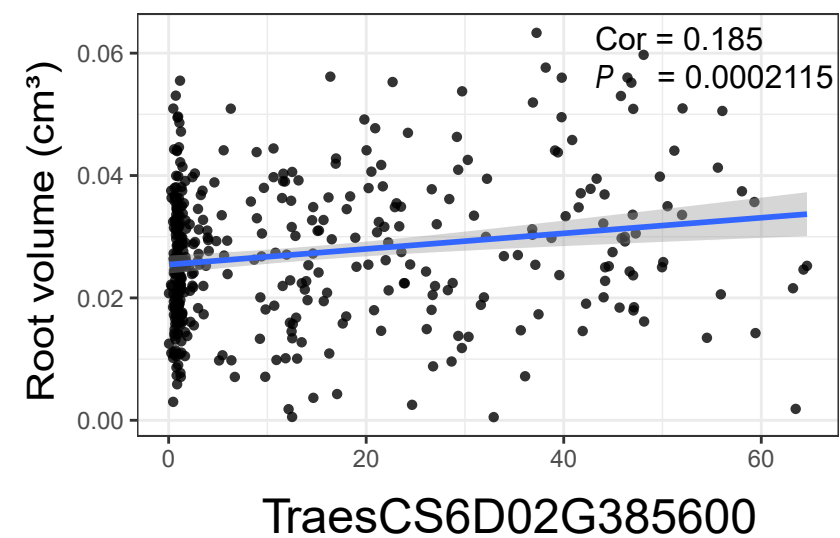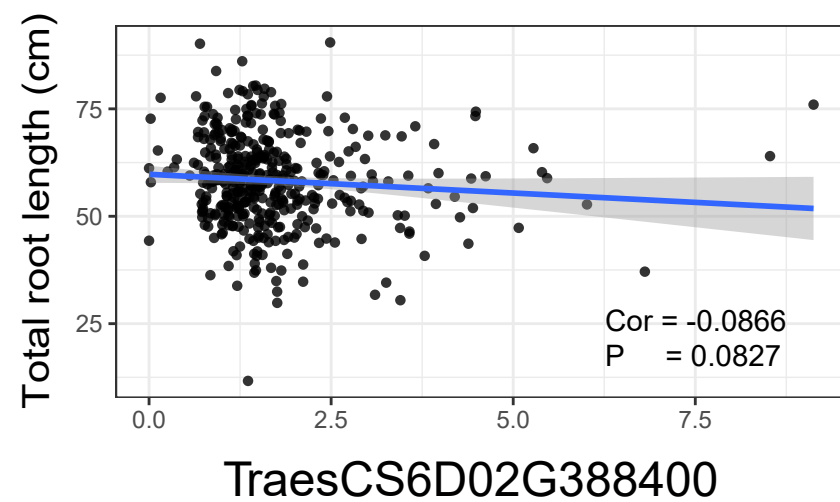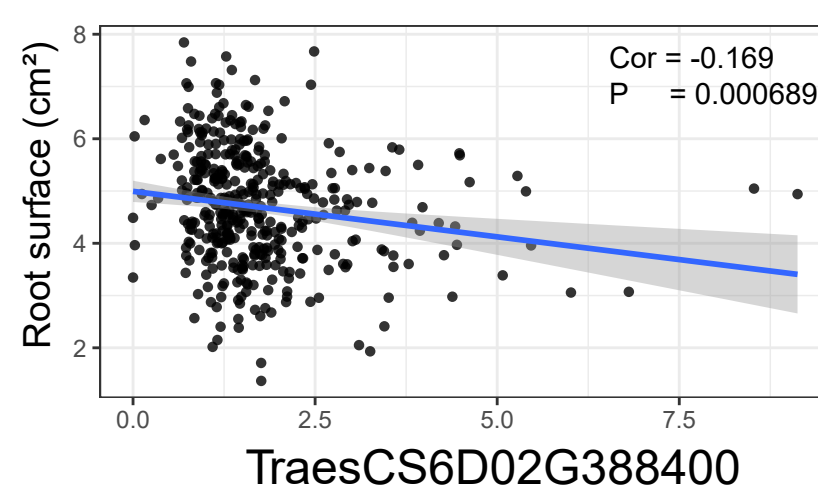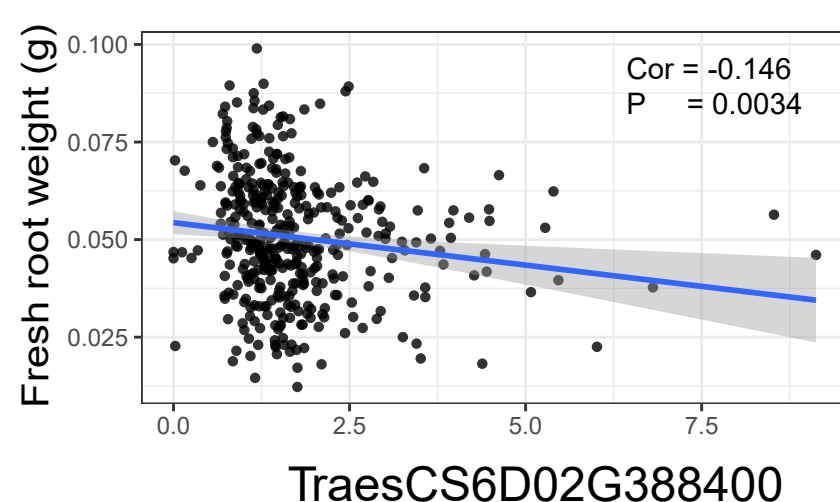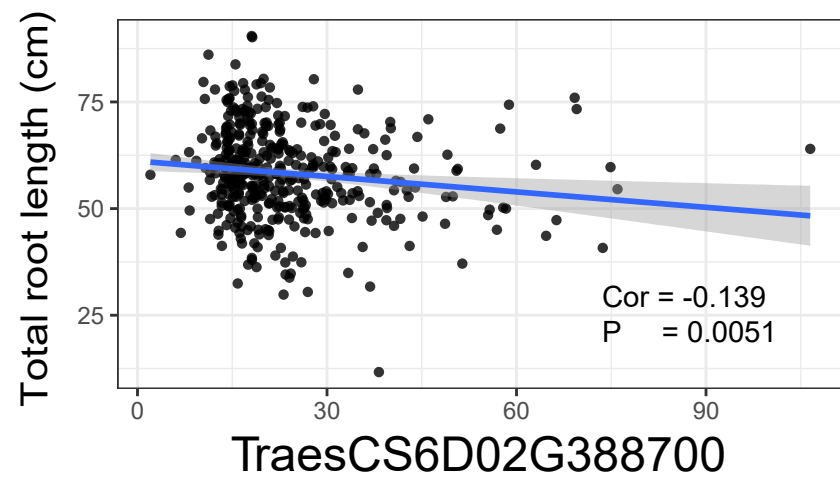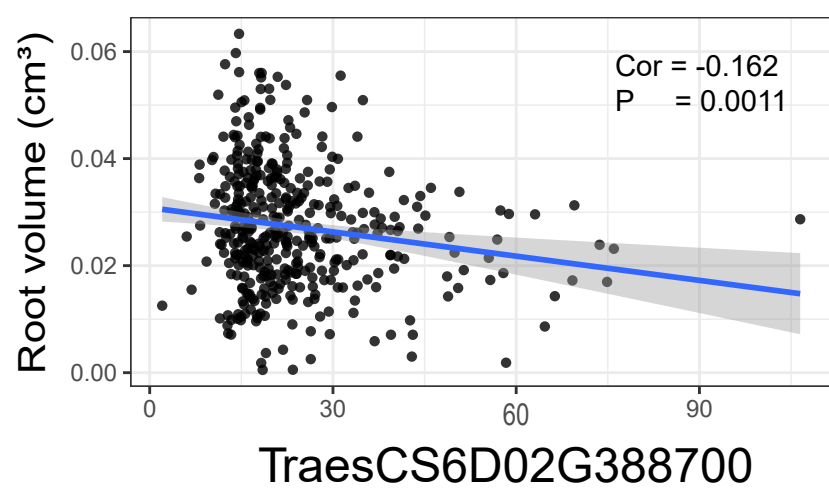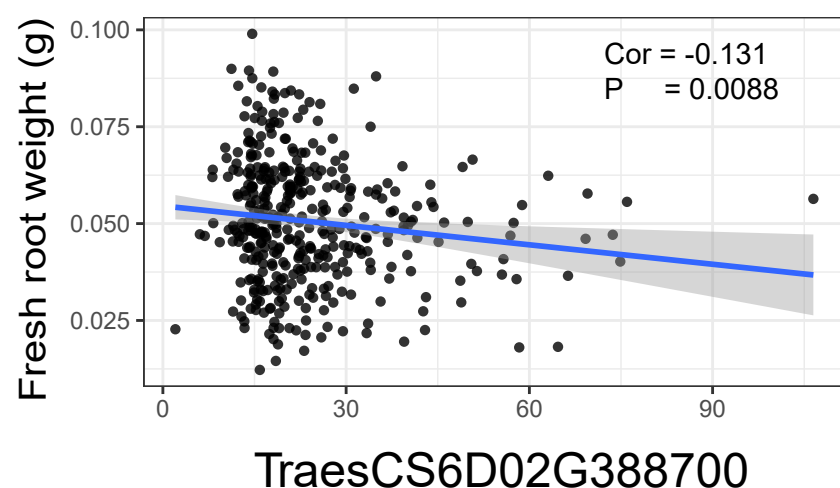

Supplement: s1 [file s1]

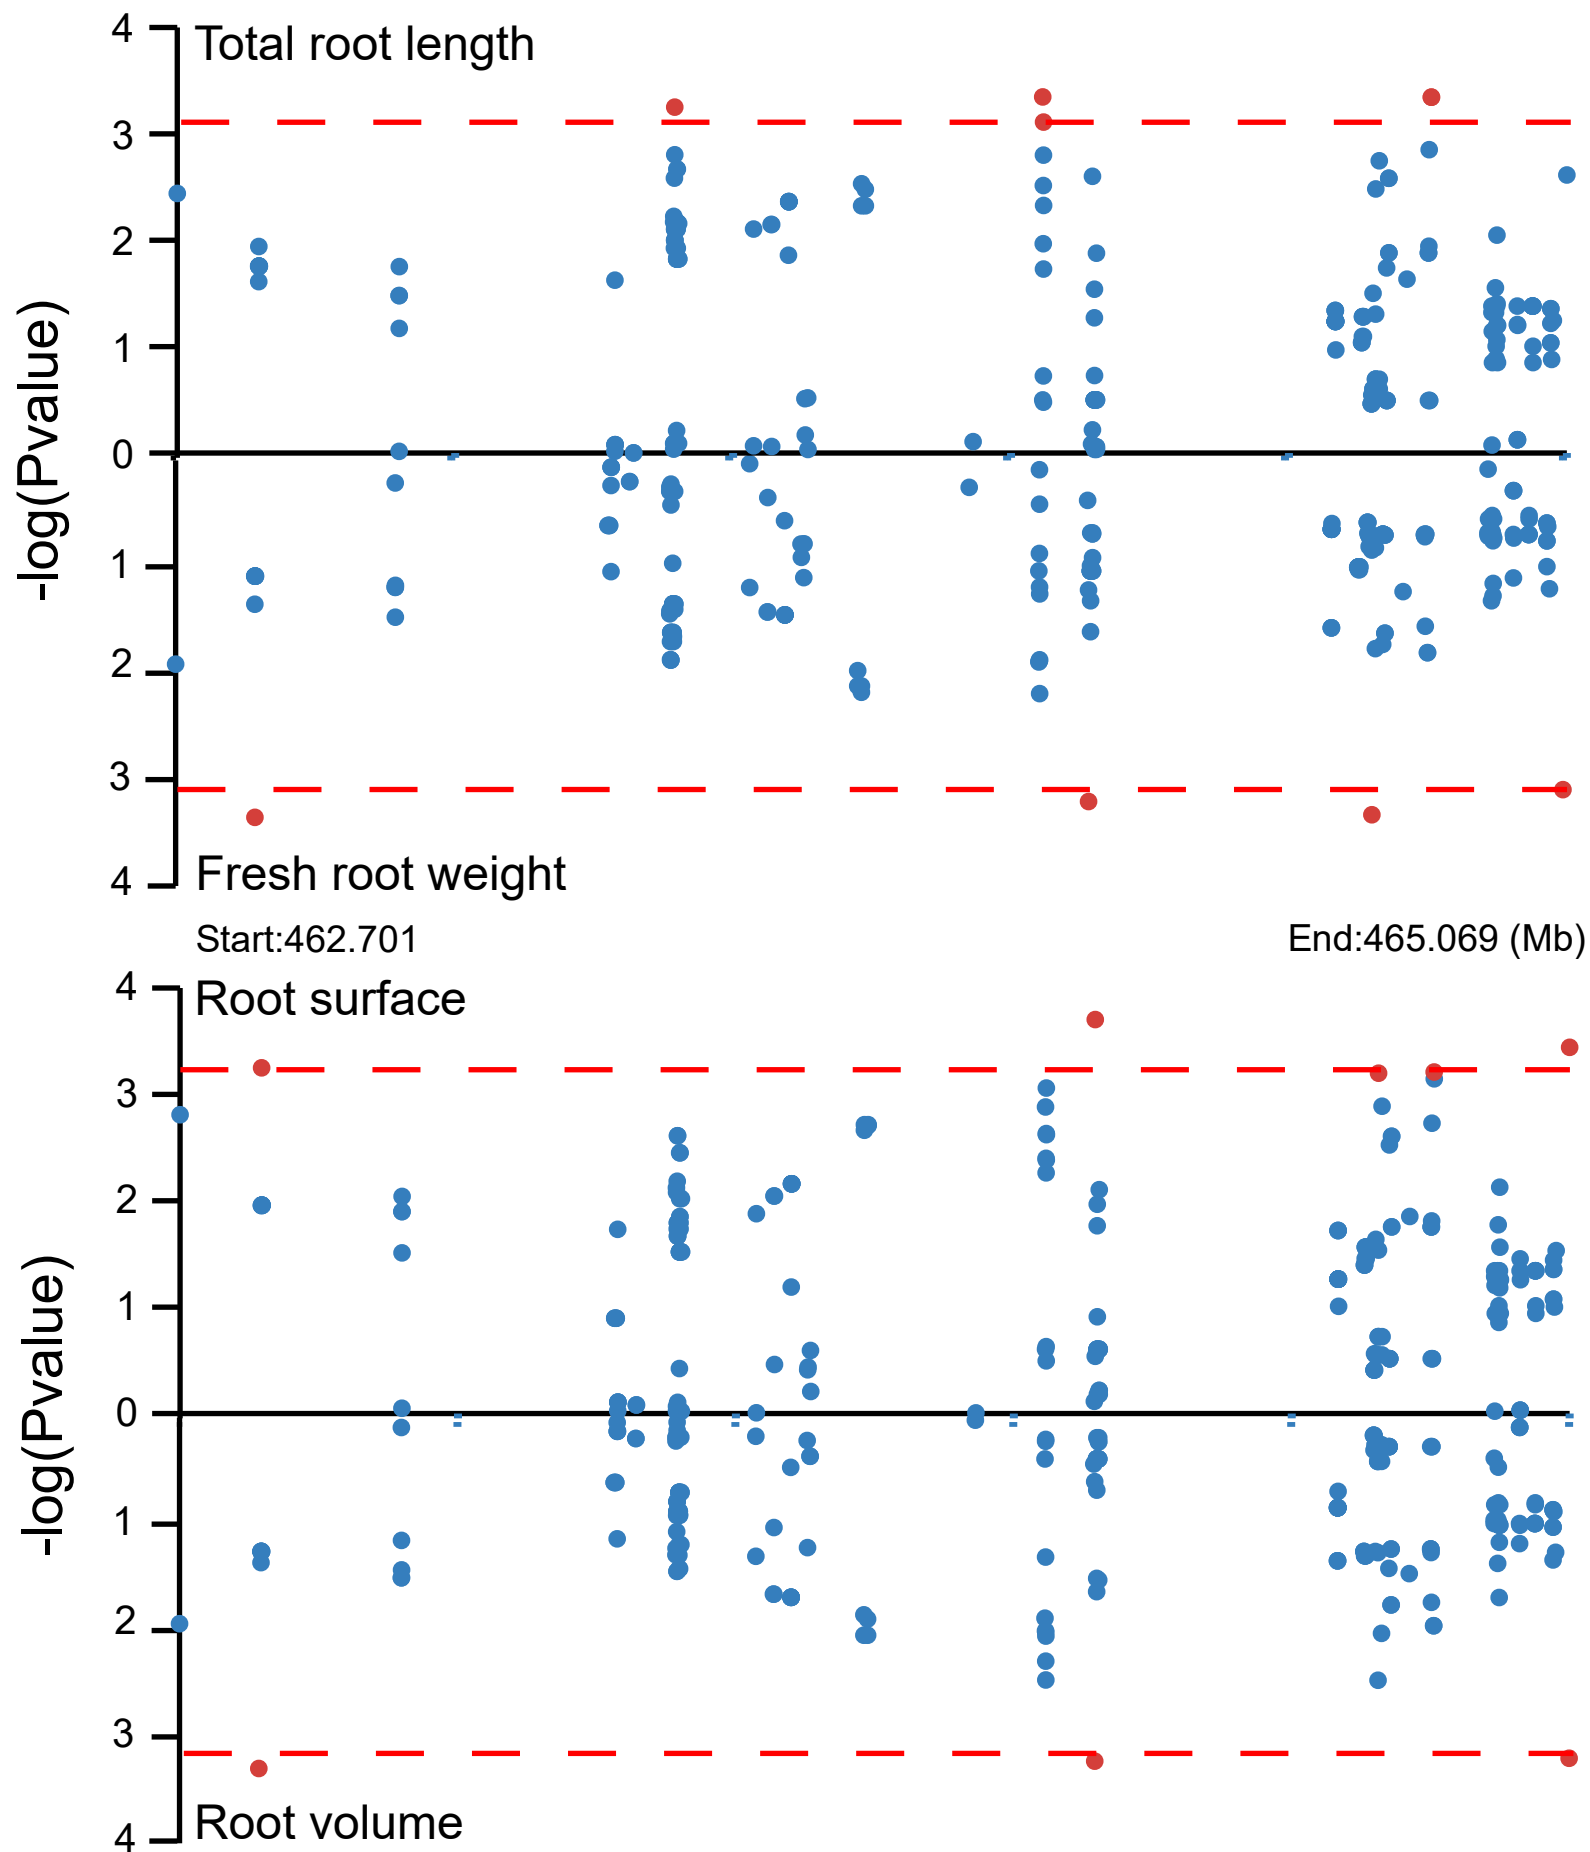

Supplement: s1 [file s1]
